# Supplementary material for: Dose-sparing effect of lapatinib co-administered with a high-fat enteral nutrition emulsion: preclinical pharmacokinetic study
Source: PeerJ. 2023 Oct 9;11:e16207. doi: 10.7717/peerj.16207 (PMC10569162; doi:10.7717/peerj.16207)
Supplement: Supplemental Information 1 [file peerj-11-16207-s001.xlsx]

## Sheet: Table 1
Table 1 Typical calibration curves of lapatinib in rabbit plasma
Calibration curve	Linearity range (ng/ml)	Weighting coefficient	r
1.02805 * x + 1.26591	5~1000	1/x2	0.999
1.05515 * x + 2.14422	5~1000	1/x2	0.997
1.00165 * x + 1.25098	5~1000	1/x2	0.998

## Sheet: Table 2
Table 2 Intra- and inter-day precision and accuracy of lapatinib in rabbit plasma
Batch	No.	Lapatinib concentration (ng/mL)
		5	10	500	800
Batch 1	1	4.915	11.394	541.925	840.895
	2	5.211	11.334	537.694	835.661
	3	5.409	11.929	543.139	835.609
	4	5.383	10.729	541.888	846.682
	5	5.105	11.392	550.528	814.07
	Average	5.2	11.36	543.03	834.58
	SD	0.2	0.43	4.67	12.34
	Precision (%)	3.93	3.75	0.86	1.48
	Accuracy (%)	4.09	13.56	8.61	4.32
Batch 2	1	4.632	10.842	534.3	796.223
	2	5.056	10.973	518.6	819.719
	3	4.756	10.999	555.4	803.1
	4	4.467	10.443	549.9	817.095
	5	4.389	11.171	531.1	789.121
	Average	4.66	10.89	537.86	805.05
	SD	0.26	0.27	14.85	13.19
	Precision (%)	5.65	2.51	2.76	1.64
	Accuracy (%)	-6.8	8.86	7.57	0.63
Batch 3	1	5.733	9.731	478.195	777.606
	2	5.262	9.945	479.248	777.251
	3	5.637	10.116	482.636	792.364
	4	4.766	10.281	488.869	788.966
	5	4.967	10.064	483.707	779.918
	Average	5.27	10.03	482.53	783.22
	SD	0.42	0.21	4.22	6.98
	Precision (%)	7.9	2.04	0.87	0.89
	Accuracy (%)	5.46	0.27	-3.49	-2.1
	n	15	15	15	15
	Average	5.05	10.76	521.14	807.62
	SD	0.4	0.64	29.63	24.12
	Inter-day precision (%)	7.98	5.95	5.68	2.99
	Inter-day accuracy (%)	0.92	7.56	4.23	0.95

## Sheet: Table 3
Table 3 Extraction recovery of lapatinib in rabbit plasma
Nominal concentration (ng/mL)	Lapatinib peak area of samples spiked before extraction	Lapatinib peak area of samples spiked after extraction	Extraction recovery (%)	IS-normalized extraction recovery (%)
10	2935.7	3483	84.23	97.93
	2946.8	3463.7	84.55	98.3
	2959.8	3614.9	84.92	98.74
	3079.3	3451.6	88.35	102.72
	2986	3413.2	85.67	99.61
500	125884	152703	90.35	101.45
	127900	138239	91.8	103.07
	125046	123551	89.75	100.77
	118340	138609	84.94	95.37
	123915	143537	88.94	99.86
800	208577	212307	98.86	102.15
	211611	207702	100.3	103.64
	207576	211297	98.39	101.66
	209596	214514	99.35	102.65
	218262	209065	103.45	106.9

## Sheet: Table 4
Table 4 Matrix effect of lapatinib in rabbit plasma
Nominal concentration (ng/mL)	Lapatinib peak area		IS peak area		Lapatinib matrix factor (%)	IS matrix factor (%)	IS-normalized matrix factor (%)
	Sample spiked after extraction	Sample spiked in pure solution	Sample spiked after extraction	Sample spiked in pure solution
10	3483	2509	76125.3	53649	122.94	138.25	88.26
	3463.7	2762	76912.7	56144.2	122.26	139.68	87.78
	3614.9	2811.4	77257.7	56131.6	127.6	140.31	91.61
	3451.6	3080.8	77676	54743.6	121.84	141.07	87.47
	3413.2	2945.8	75931.1	55548.8	120.48	137.9	86.5
	3247.8	2888.8	76272.8	54163.7	114.64	138.52	82.3
800	212307	179925	71282	52783	113.18	130.44	89.17
	207702	186079	68640	53949	110.73	125.61	87.24
	211297	183828	68369	53554	112.65	125.11	88.75
	214514	190205	69914	55414	114.36	127.94	90.1
	209065	197465	68736	57924	111.46	125.78	87.81
	212179	187960	69233	54252	113.12	126.69	89.12

## Sheet: Table 5
Table 5 Stability (%) of lapatinib in rabbit plasma under specific condition (ice bath for 3 h)
No.	Lapatinib concentration (ng/mL)
	10	800
1	12.7	805.5
2	11.92	811.8
3	12.59	810.6

## Sheet: Table 6
Table 6 Stability (%) of lapatinib in rabbit plasma under specific condition (ice bath for 3 h after sample preparation)
No.	Lapatinib concentration (ng/mL)
	10	800
1	10.96	806.2
2	11.64	823.1
3	11.53	815.3

## Sheet: Table 7
Table 7 Stability (%) of lapatinib in rabbit plasma under specific condition (autosampler room (10 °C) for 4 h after sample preparation)
No.	Lapatinib concentration (ng/mL)
	10	800
1	10.999	813.078
2	10.726	814.383
3	10.932	820

## Sheet: Table 8
Table 8 Stability (%) of lapatinib in rabbit plasma under specific condition (–80 °C refrigerator for 14 days)
No.	Lapatinib concentration (ng/mL)
	10	800
1	9.2	811.6
2	10.11	820.6
3	9.85	817

## Sheet: Table 9
Table 9 Stability (%) of lapatinib in rabbit plasma under specific condition (three freeze–thaw cycles)
No.	Lapatinib concentration (ng/mL)
	10	800
1	9.56	798.9
2	10.25	824.9
3	10.3	824.5

## Sheet: Table 10
Table 10 Detected plasma concentration of lapatinib after a single oral dose in rabbits without TPF-T
t	No1	No2	No3	No4	No5	No6	Mean	SD
0.25	BLOQ	BLOQ	BLOQ	13.888	9.221	31.808	18.306	11.924
0.5	8.861	BLOQ	170.263	33.115	21.85	52.445	57.307	65.139
1	152.24	10.878	165.723	57.447	31.641	61.102	79.839	64.108
1.5	206.313	13.151	90.072	55.751	52.65	90.121	84.676	66.079
2	278.78	20.586	88.728	62.04	139.207	169.015	126.393	91.605
3	247.579	40.643	134.387	69.64	142.894	340.098	162.54	112.629
4	289.349	137.039	127.381	63.484	111.023	245.166	162.24	86.324
6	241.42	420.957	421.999	51.523	129.506	595.149	310.092	205.064
8	277.711	415.331	419.534	1014.83	474.167	912.907	585.747	301.712
10	391.606	130.07	125.871	428.252	219.199	396.3	281.883	139.907
12	139.208	52.533	44.756	217.073	140.274	179.627	128.912	68.55
24	52.215	18.972	31.633	103.089	33.42	30.211	44.923	30.448
48	BLOQ	BLOQ	BLOQ	BLOQ	BLOQ	5.573	5.573
72	BLOQ	BLOQ	BLOQ	BLOQ	BLOQ	BLOQ
BLOQ: below the limit of quantification.

[truncated: 7 more sheets: Table 11, Table 12, Table 13, Table 14, Table 15, Table 16, Table 17]
